# Supplementary material for: Nanoplasmonic sensing to study CO and oxygen adsorption and CO oxidation on size-selected Pt10 clusters
Source: Royal Society of Chemistry journal article supplement (doi:10.1039/d4nr02682a), 2024-01-01
Supplement: d4nr02682a1.pdf [file d4nr02682a1.pdf]

**Supplement information for Nanoplasmonic sensing to study CO and oxygen adsorption and CO oxidation on size-selected Pt<sub>10</sub> clusters.**

Benjamin Demirdjian<sup>1\*</sup>, Mykhailo Vaidulych<sup>2\*\*</sup>, Igor Ozerov<sup>1</sup>, Frédéric Bedu<sup>1</sup>, Štefan Vajda<sup>2</sup>,  
Claude R. Henry<sup>1</sup>

1) Aix Marseille Univ, CNRS, CINAM, Marseille, France

2) Department of Nanocatalysis, J. Heyrovský Institute of Physical Chemistry v.v.i., Czech Academy of Sciences, Dolejškova 2155/3, 182 23 Prague 8, Czech Republic

\*\*Corresponding Author email: [mykhailo.vaidulych@jh-inst-cas.cz](mailto:mykhailo.vaidulych@jh-inst-cas.cz) (MV)

\* Other Corresponding Author email: [benjamin.demirdjian@cnrs.fr](mailto:benjamin.demirdjian@cnrs.fr) (BD)

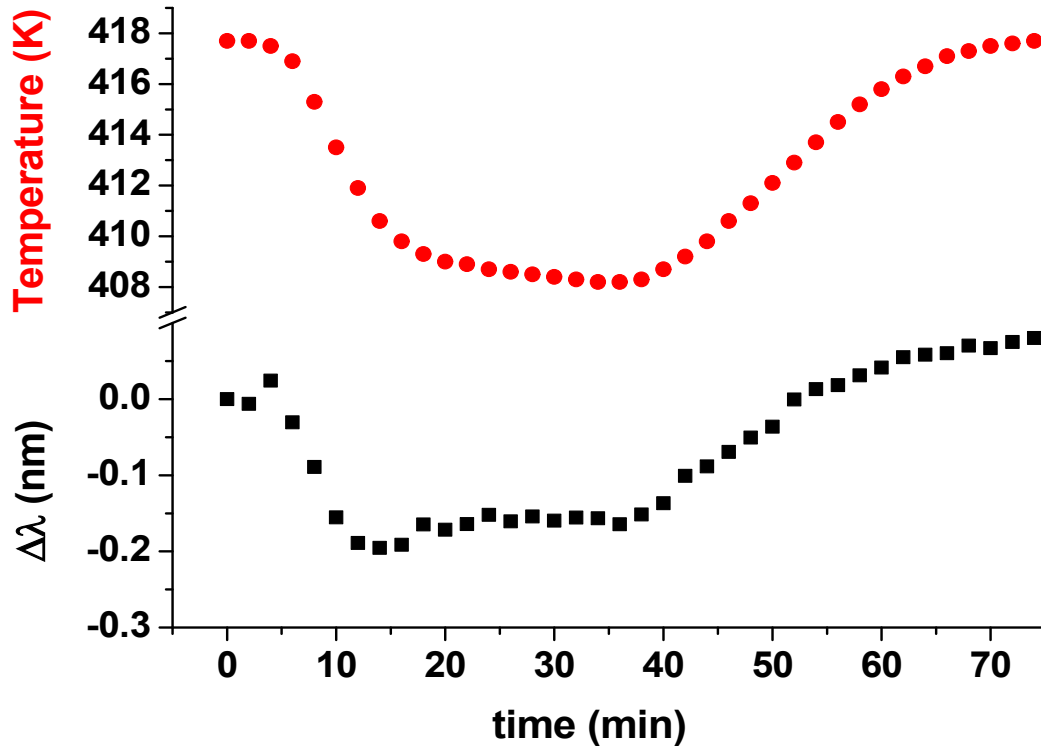

Fig. S1 Top: variation of the sample temperature ( $T$ ) versus time. Bottom: Experimental LSPR shift  $\Delta\lambda$  versus time of Au disks ( $h = 17.5$  nm,  $p = 300$  nm,  $d = 140$  nm) covered with a SiO<sub>2</sub> layer (6 nm) deposited on an ITO film (21 nm) supported on a HQ-float glass window versus time.  $\Delta\lambda$  is defined with respect to a reference which is the plasmonic sample at  $T = 418$  K under high vacuum ( $P \sim 10^{-6}$  Pa).

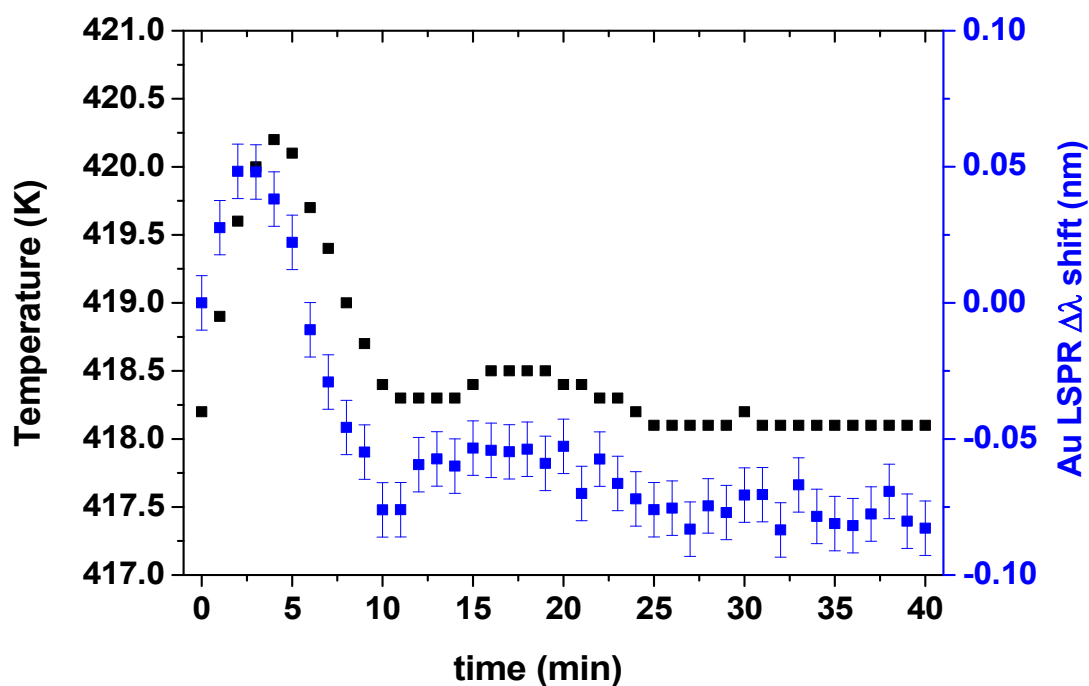

Fig. S2 Experimental Au LSPR shift and sample temperature versus time at  $T = 418$  K and  $P_{CO} = 2.3$  Pa for  $Pt_{10}$  clusters deposited on Au disks ( $h = 17.5$  nm,  $p = 300$  nm,  $d = 140$  nm) covered with a  $SiO_2$  layer (6 nm) and deposited onto an ITO-coated film (21 nm) glass window. The LSPR shift is defined with respect to a reference which is the plasmonic sample before CO adsorption. The accuracy of the wavelength measurements in the LSPR response is 0.01 nm (error bars).

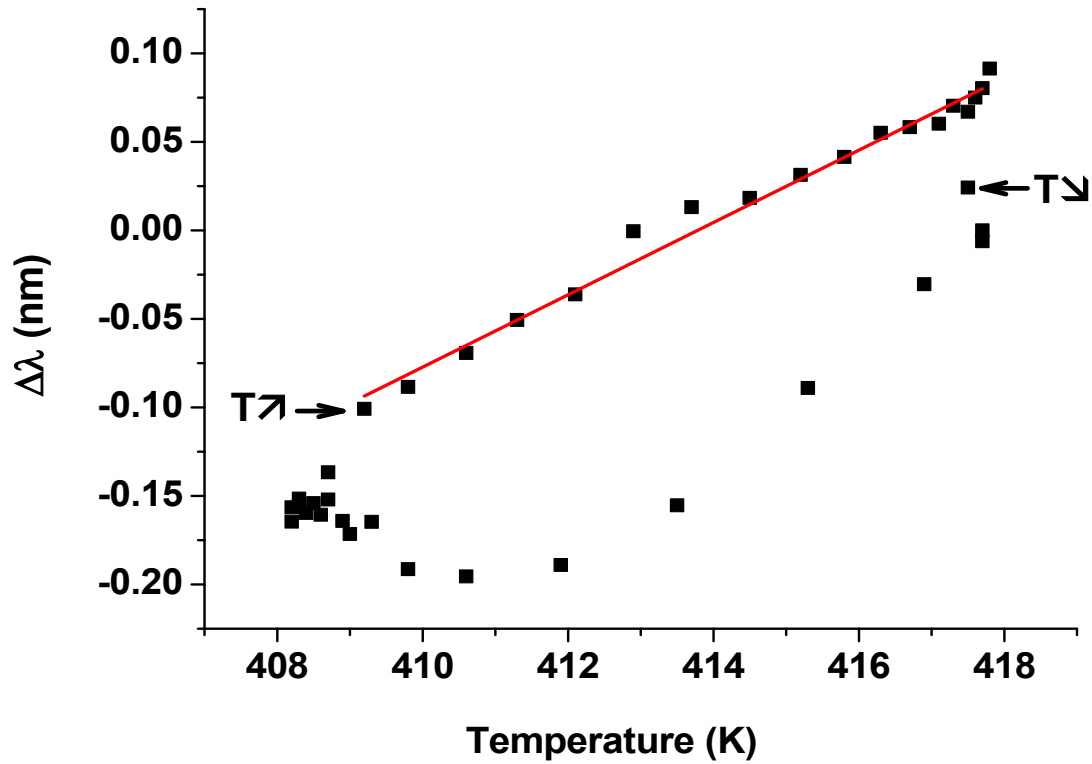

Fig. S3 Experimental LSPR shift  $\Delta\lambda$  versus sample temperature ( $T$ ) of Au disks ( $h = 17.5$  nm,  $p = 300$  nm,  $d = 140$  nm) covered with a SiO<sub>2</sub> layer (6 nm) deposited on an ITO film (21 nm) supported on a HQ-float glass window.  $\Delta\lambda$  is defined with respect to a reference which is the plasmonic sample at  $T = 418$  K under high vacuum ( $P \sim 10^{-6}$  Pa). There is a linear (fitted) part corresponding to the increase in  $T$  and a non-linear part corresponding to the decrease in  $T$ .
